# Supplementary material for: Integrative genomic analysis focused on cell cycle genes for MYC-driven aggressive mature B-cell lymphoma
Source: PubMed Central journal article supplement — J Clin Exp Hematop. 2020 Sep 25;60(3):87–96. doi: 10.3960/jslrt.20021 (PMC7596913; doi:10.3960/jslrt.20021), 2020-09-25
Supplement: jslrt-60-87-s001.pdf [file jslrt-60-87-s001.pdf]

Supplementary Materials

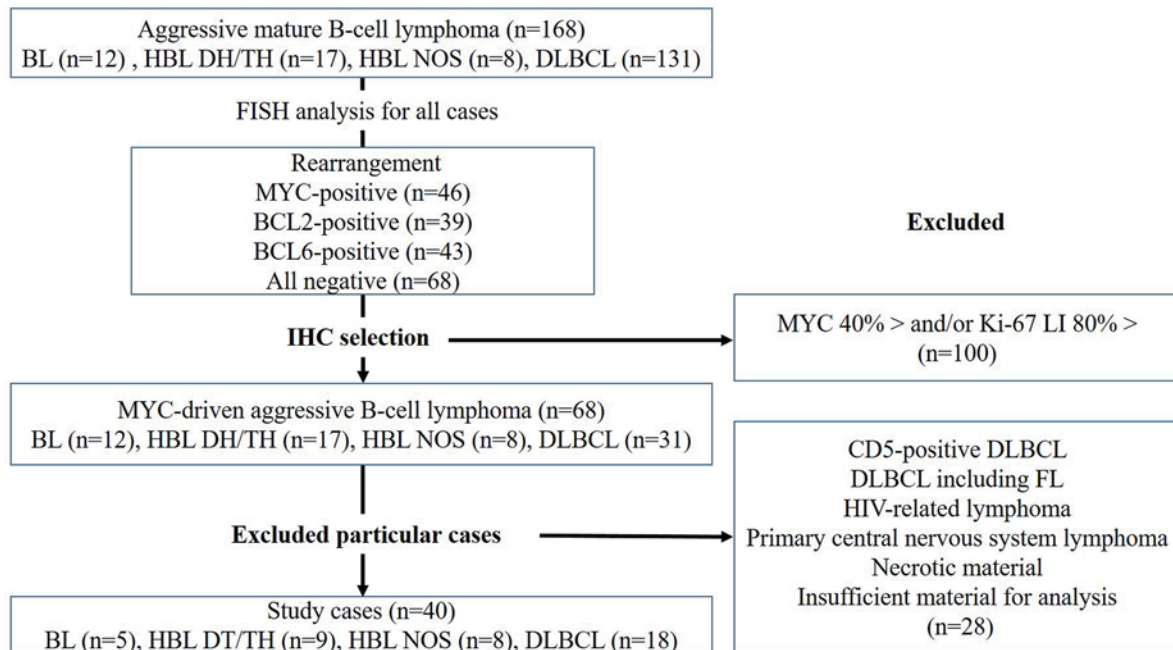

Supplementary Fig. S1. Flow diagram for case selection

The information of case selection in our study by IHC selection and exception of particular cases.

FISH: fluorescence *in situ* hybridization, Ki-67 LI: Ki-67 labeling index, BL: Burkitt lymphoma, HBL-DH/TH: high-grade B-cell lymphoma double hit/ triple hit, HBL NOS: high-grade B-cell lymphoma, not otherwise classified, DLBCL: diffuse large B-cell lymphoma, HIV: human immune deficiency virus, IHC: immunohistochemistry.

| Diagnosis      | BL       |    |    |    |    | HBL-DL/TH |   |    |    |    |    |    |    | HBL, NOS |   |    |    |    |    |          |    | DLBCL |    |    |    |    |    |   |    |    |    |    |    |    |    |    |    |    |    |
|----------------|----------|----|----|----|----|-----------|---|----|----|----|----|----|----|----------|---|----|----|----|----|----------|----|-------|----|----|----|----|----|---|----|----|----|----|----|----|----|----|----|----|----|
|                | 20       | 32 | 34 | 35 | 38 | 6         | 9 | 12 | 13 | 21 | 28 | 55 | 68 | 14       | 4 | 11 | 17 | 30 | 36 | 42       | 62 | 48    | 41 | 53 | 15 | 52 | 57 | 5 | 10 | 19 | 27 | 44 | 49 | 65 | 16 | 37 | 46 | 58 | 64 |
| Hans algorithm | GCB      |    |    |    |    | GCB       |   |    |    |    |    |    |    |          |   |    |    |    |    | Non-GCB  |    |       |    |    |    |    |    |   |    |    |    |    |    |    |    |    |    |    |    |
| Rearrangement  | negative |    |    |    |    | negative  |   |    |    |    |    |    |    |          |   |    |    |    |    | positive |    |       |    |    |    |    |    |   |    |    |    |    |    |    |    |    |    |    |    |
| MYC            | negative |    |    |    |    | positive  |   |    |    |    |    |    |    |          |   |    |    |    |    | positive |    |       |    |    |    |    |    |   |    |    |    |    |    |    |    |    |    |    |    |
| BCL2           | negative |    |    |    |    | positive  |   |    |    |    |    |    |    |          |   |    |    |    |    | positive |    |       |    |    |    |    |    |   |    |    |    |    |    |    |    |    |    |    |    |
| BCL6           | negative |    |    |    |    | positive  |   |    |    |    |    |    |    |          |   |    |    |    |    | positive |    |       |    |    |    |    |    |   |    |    |    |    |    |    |    |    |    |    |    |
| IHC            | negative |    |    |    |    | positive  |   |    |    |    |    |    |    |          |   |    |    |    |    | positive |    |       |    |    |    |    |    |   |    |    |    |    |    |    |    |    |    |    |    |
| MYC            | positive |    |    |    |    | positive  |   |    |    |    |    |    |    |          |   |    |    |    |    | positive |    |       |    |    |    |    |    |   |    |    |    |    |    |    |    |    |    |    |    |
| BCL2           | positive |    |    |    |    | positive  |   |    |    |    |    |    |    |          |   |    |    |    |    | positive |    |       |    |    |    |    |    |   |    |    |    |    |    |    |    |    |    |    |    |
| CD10           | positive |    |    |    |    | positive  |   |    |    |    |    |    |    |          |   |    |    |    |    | positive |    |       |    |    |    |    |    |   |    |    |    |    |    |    |    |    |    |    |    |
| BCL6           | positive |    |    |    |    | positive  |   |    |    |    |    |    |    |          |   |    |    |    |    | positive |    |       |    |    |    |    |    |   |    |    |    |    |    |    |    |    |    |    |    |
| IRF4           | positive |    |    |    |    | positive  |   |    |    |    |    |    |    |          |   |    |    |    |    | positive |    |       |    |    |    |    |    |   |    |    |    |    |    |    |    |    |    |    |    |
| Ki-67 LI       | ≥ 40     |    |    |    |    | ≥ 40      |   |    |    |    |    |    |    |          |   |    |    |    |    | ≥ 40     |    |       |    |    |    |    |    |   |    |    |    |    |    |    |    |    |    |    |    |
| Morphology     | BL       |    |    |    |    | U         |   |    |    |    |    |    |    |          |   |    |    |    |    | DL       |    |       |    |    |    |    |    |   |    |    |    |    |    |    |    |    |    |    |    |

Hans algorithm

- GCB
- Non-GCB

Rearrangement

- positive

MYC expression (%)

- ≥ 40
- ≥ 60
- ≥ 80

BCL2 expression

- positive

CD10 expression

- positive

BCL6 expression

- positive

IRF4 expression

- positive

Ki-67 expression (%)

- ≥ 95

Morphology

- BL Burkitt
- U BCL-U
- DL DLBCL

Supplementary Fig. S2. IHC and rearrangement results of all cases

According to the Hans algorithm, 28 cases (70%) were assigned to the GCB type and 12 cases (30%) were assigned to the non-GCB type. After exclusion of Burkitt lymphoma, 31 (89%) of 35 cases were double expressors. MYC, BCL2 and BCL6 rearrangements were found in 22 (55%), 11 (28%) and 10 (25%) of 40 cases. BL: Burkitt lymphoma, HBL-DH/TH: high-grade B-cell lymphoma double hit/ triple hit, HBL NOS: high-grade B-cell lymphoma, not otherwise classified, DLBCL: diffuse large B-cell lymphoma, IHC: immunohistochemistry, GCB: germinal center B-cell lymphoma. BCL-U: B-cell lymphoma, unclassifiable with features intermediate between DLBCL and Burkitt lymphoma, DLBCL: diffuse large B-cell lymphoma.

**Supplementary Table S1.** Target regions of our panel

| Gene (Accession No.)       | Chr. | Exon | Exonregion |     | Targetregion |           | Coveroftargetregion(%) |           |       |
|----------------------------|------|------|------------|-----|--------------|-----------|------------------------|-----------|-------|
|                            |      |      | Start      | End | Start        | End       |                        |           |       |
| <i>MYC</i> (NM_002467)     | 8    | 1    | 128748315  | to  | 128748869    | 128748829 | to                     | 128748879 | 100   |
|                            |      | 2    | 128750494  | to  | 128751265    | 128750483 | to                     | 128751275 | 94.19 |
|                            |      | 3    | 128752642  | to  | 128753680    | 128752631 | to                     | 128753214 | 100   |
| <i>MAX</i> (NM_002382)     | 14   | 1    | 65569022   | to  | 65569057     | 65569011  | to                     | 65569067  | 66.07 |
|                            |      | 2    | 65568264   | to  | 65568290     | 65568253  | to                     | 65568300  | 100   |
|                            |      | 3    | 65560426   | to  | 65560533     | 65560415  | to                     | 65560543  | 100   |
|                            |      | 4    | 65544631   | to  | 65544754     | 65544620  | to                     | 65544764  | 100   |
|                            |      | 5    | 65541842   | to  | 65543381     | 65543183  | to                     | 65543391  | 83.65 |
| <i>MAX</i> (NM_001271068)  |      | 3    | 65550457   | to  | 65551017     | 65550887  | to                     | 65551027  | 100   |
| <i>TP53</i> (NM_000546)    | 17   | 5    | 7578371    | to  | 7579554      | 7578371   | to                     | 7579554   | 95.63 |
|                            |      | 6    | 7578177    | to  | 7578289      | 7578177   | to                     | 7578289   | 100   |
|                            |      | 7    | 7577499    | to  | 7577608      | 7577499   | to                     | 7577608   | 100   |
|                            |      | 8    | 7577019    | to  | 7577155      | 7577019   | to                     | 7577155   | 100   |
| <i>CCND3</i> (NM_001760)   | 6    | 5    | 41902671   | to  | 41903845     | 41903671  | to                     | 41903951  | 100   |
| <i>CDKN2A</i> (NM_00077)   | 9    | 2    | 21970901   | to  | 21971207     | 21970901  | to                     | 21970991  | 100   |
| <i>BTG1</i> (NM_001731)    | 12   | 1    | 92539164   | to  | 92539673     | 92539164  | to                     | 92539312  | 100   |
|                            |      | 2    | 92534054   | to  | 92538223     | 92537856  | to                     | 92538223  | 100   |
| <i>BTG2</i> (NM_006763)    | 1    | 1    | 203274664  | to  | 203274876    | 203274735 | to                     | 203274876 | 95.04 |
|                            |      | 2    | 203276232  | to  | 203278729    | 203276227 | to                     | 203276553 | 97.06 |
| <i>ID3</i> (NM_002167)     | 1    | 1    | 23885618   | to  | 23886285     | 23885607  | to                     | 23885927  | 95    |
|                            |      | 2    | 23885426   | to  | 23885510     | 23885440  | to                     | 23885520  | 100   |
| <i>TCF3</i> (NM_001136139) | 19   | 17   | 1612206    | to  | 1612432      | 1612290   | to                     | 1612380   | 100   |

The information of exon regions, target regions of each gene and the coverage of target regions by each amplicon. Chr: chromosome.

**Supplementary Table S2.** PCR composition and condition

| (A)       | PCR Component                                         | Amount       |
|-----------|-------------------------------------------------------|--------------|
|           | Qiagen Multiplex PCR master mix (Qiagen)              | 12 µl        |
|           | Ion ampliseq custom panel primer pool (Thermo Fisher) | 8 µl         |
|           | Diluted FFPE DNA                                      | 5 µl (40 ng) |
|           | Total                                                 | 25 µl        |
| (B)       | PCR condition                                         |              |
| 23 cycles | First denaturation (95 °C)                            | 15 min       |
|           | Denaturation (94 °C)                                  | 30 sec       |
|           | Annealing (60 °C)                                     | 90 sec       |
|           | Extension (68 °C)                                     | 15 sec       |
|           | Final extension (72 °C)                               | 10 min       |

(A) The information of the amounts of DNA polymerase, DNA extracted from FFPE and composition of the PCR primers. (B) PCR conditions, including the cycle number, and the degree and time of denaturation, annealing and extension. PCR: polymerase chain reaction, FFPE: formalin-fixed and paraffin-embedded

**Supplementary Table S3.** Limit of detection (Raji)

|             | VAF     | 100% | 20%  | 5%  |
|-------------|---------|------|------|-----|
| <i>MYC</i>  | p.V20A  | 58.7 | 9.5  | 2.7 |
|             | p.S21T  | 56.7 | 8.0  | 2.7 |
|             | p.E54D  | 45.2 | 8.3  | 2.1 |
|             | p.A59V  | 50.4 | 7.1  | 1.7 |
| <i>TP53</i> | p.R213Q | 50.4 | 8.5  | 2.3 |
|             | p.Y234H | 59.7 | 9.2  | 2.6 |
|             |         | 50.4 | 11.7 | 3.5 |
|             |         | 50.4 | 11.6 | 3.6 |
| <i>TP53</i> | p.R213Q | 37.7 | 5.1  | 1.2 |
|             | p.Y234H | 59.7 | 6.5  | 1.5 |
|             |         |      | 10.7 | 2.7 |
|             |         |      | 10.1 | 3.1 |

The precise percentage (%) of effected VAF of *MYC* (p.V20A, p.S21T, p.E54D, p.A59V) and *TP53* (p.R213Q, p.Y234H). VAF: variant allele fraction.

Supplementary Table S4. Pathological and genetic status/prediction-function

|                                     |                                                    |                                                                                                          |                                                                                          |
|-------------------------------------|----------------------------------------------------|----------------------------------------------------------------------------------------------------------|------------------------------------------------------------------------------------------|
| MSKCC impact<br>High/Medium/<br>Low | FATHMM impact<br>Disease-<br>Oncogenic/<br>Neutral | FATHMM impact<br>Cancer-associated<br>variant (Cancer)/<br>non-cancer-associated<br>variant (Non-Cancer) | InterVar<br>Pathogenesis/<br>Likely pathogen-<br>esis/Uncertain sig-<br>nificance/Benign |
|-------------------------------------|----------------------------------------------------|----------------------------------------------------------------------------------------------------------|------------------------------------------------------------------------------------------|

| Case number | Diagnosis | Rearrangement |      | Hans algorithm (%) | IHC     |         |      |      | Ki-67 (%) | ID3 (NP_002158) | BTG2 (NP_006754) | CCND3 (NP_001751) | MYC (NP_002458) | CDKN2A (NP_000068) | BTG1 (NP_001722) | MAX (NP_002373) | TP53 (NP_0000537) | TCF3 (NP_001129611) |
|-------------|-----------|---------------|------|--------------------|---------|---------|------|------|-----------|-----------------|------------------|-------------------|-----------------|--------------------|------------------|-----------------|-------------------|---------------------|
|             |           | MYC           | BCL2 |                    | BCL6    | MYC (%) | BCL2 | CD10 |           |                 |                  |                   |                 |                    |                  |                 |                   |                     |
| 4           | HBL NOS   | +             | -    | -                  | GCB     | 90      | -    | +    | +         | -               | +                | -                 | -               | +                  | -                | -               | -                 | 99                  |
| 5           | DLBCL     | -             | -    | +                  | GCB     | 99      | -    | +    | +         | +               | +                | +                 | +               | +                  | -                | -               | -                 | 99                  |
| 6           | HBL-DH    | +             | +    | -                  | GCB     | 70      | +    | +    | +         | -               | -                | -                 | -               | -                  | -                | -               | -                 | 95                  |
| 9           | HBL-DH    | +             | -    | -                  | GCB     | 80      | +    | +    | +         | +               | +                | +                 | +               | +                  | -                | -               | -                 | 99                  |
| 10          | DLBCL     | -             | -    | +                  | non-GCB | 99      | +    | +    | +         | +               | +                | +                 | +               | +                  | -                | -               | -                 | 90                  |
| 11          | HBL NOS   | +             | -    | -                  | GCB     | 90      | +    | +    | +         | +               | +                | +                 | +               | +                  | -                | -               | -                 | 99                  |
| 12          | HBL-DH    | +             | +    | -                  | GCB     | 60      | +    | +    | +         | +               | +                | +                 | +               | +                  | -                | -               | -                 | 99                  |
| 13          | HBL-DH    | +             | +    | -                  | GCB     | 80      | +    | +    | +         | +               | +                | +                 | +               | +                  | -                | -               | -                 | 99                  |
| 14          | HBL-TH    | +             | +    | +                  | GCB     | 90      | +    | +    | +         | +               | +                | +                 | +               | +                  | -                | -               | -                 | 80                  |

  

|                                                                                                                                                                                                                                                                                                                                                                                                                                                                                                                                                                                                                                                                                                                                 |                                                                                                                                                                                                        |
|---------------------------------------------------------------------------------------------------------------------------------------------------------------------------------------------------------------------------------------------------------------------------------------------------------------------------------------------------------------------------------------------------------------------------------------------------------------------------------------------------------------------------------------------------------------------------------------------------------------------------------------------------------------------------------------------------------------------------------|--------------------------------------------------------------------------------------------------------------------------------------------------------------------------------------------------------|
| <p>D37G (Medium/<br/>Oncogenic/Non-cancer/Uncertain<br/>significance)</p> <p>A148T (Medium/<br/>Neutral/Cancer/<br/>Benign)</p> <p>S53I (Medium/<br/>Oncogenic/Non-cancer/Likely<br/>pathogenic)</p> <p>P72T (Medium/<br/>Oncogenic/Non-cancer/Likely<br/>pathogenic)</p> <p>T73I (Medium/<br/>Oncogenic/Non-cancer/Likely<br/>pathogenic)</p> <p>K158N (Medium/<br/>NA/Non-cancer/<br/>Uncertain<br/>significance)</p> <p>H74D (Medium/<br/>Oncogenic/Non-cancer/Uncertain<br/>significance)</p> <p>P17A (Medium/<br/>Oncogenic/Non-cancer/Uncertain<br/>significance)</p> <p>Y27F (Medium/<br/>Oncogenic/Non-cancer/Uncertain<br/>significance)</p> <p>Y47C (Medium/<br/>Oncogenic/Non-cancer/Uncertain<br/>significance)</p> | <p>R196* (NA/NA/<br/>NA/Pathogenic)</p> <p>L26fs (NA)</p> <p>M246I (Medium/<br/>Oncogenic/<br/>Cancer/Likely<br/>pathogenic)</p> <p>N551K (Medium/<br/>Oncogenic/Non-cancer/Likely<br/>pathogenic)</p> |
|---------------------------------------------------------------------------------------------------------------------------------------------------------------------------------------------------------------------------------------------------------------------------------------------------------------------------------------------------------------------------------------------------------------------------------------------------------------------------------------------------------------------------------------------------------------------------------------------------------------------------------------------------------------------------------------------------------------------------------|--------------------------------------------------------------------------------------------------------------------------------------------------------------------------------------------------------|

| Case number | Diagnosis | Rearrangement |      |      | Hans    |      |      | IHC  |      |           | ID3 (NP_002158) | BTG2 (NP_006754)                                                   | CCND3 (NP_001751) | MYC (NP_002458) | CDKN2A (NP_000068) | BTG1 (NP_001722) | MAX (NP_002373) | TP53 (NP_0000537) | TCF3 (NP_001129611)                                                                                          |                                                        |
|-------------|-----------|---------------|------|------|---------|------|------|------|------|-----------|-----------------|--------------------------------------------------------------------|-------------------|-----------------|--------------------|------------------|-----------------|-------------------|--------------------------------------------------------------------------------------------------------------|--------------------------------------------------------|
|             |           | MYC           | BCL2 | BCL6 | MYC (%) | BCL2 | CD10 | BCL6 | IRF4 | Ki-67 (%) |                 |                                                                    |                   |                 |                    |                  |                 |                   |                                                                                                              |                                                        |
| 15          | DLBCL     | -             | +    | -    | non-GCB | 40   | +    | -    | +    | +         | 85              |                                                                    |                   |                 |                    |                  |                 |                   |                                                                                                              |                                                        |
| 16          | DLBCL     | -             | -    | -    | non-GCB | 90   | +    | -    | -    | +         | 95              |                                                                    |                   |                 |                    |                  |                 |                   |                                                                                                              |                                                        |
| 17          | HBL NOS   | +             | -    | -    | GCB     | 80   | -    | +    | +    | +         | 99              |                                                                    |                   |                 |                    |                  |                 |                   | R273H (Medium/Oncogenic/Cancer/Pathogenic)                                                                   |                                                        |
| 19          | DLBCL     | -             | -    | +    | non-GCB | 60   | +    | -    | +    | +         | 90              |                                                                    |                   |                 |                    |                  |                 |                   |                                                                                                              |                                                        |
| 20          | BL        | +             | -    | -    | GCB     | 90   | -    | +    | +    | +         | 99              | L70P (High/Oncogenic/Cancer/significance)                          |                   |                 |                    |                  |                 |                   |                                                                                                              |                                                        |
| 21          | HBL-DH    | +             | -    | -    | GCB     | 90   | +    | +    | +    | +         | 95              | L20F (Low/Oncogenic/Non-cancer/Uncertain significance)             |                   |                 |                    |                  |                 |                   |                                                                                                              |                                                        |
| 27          | DLBCL     | -             | -    | +    | non-GCB | 80   | +    | -    | +    | +         | 95              | G117D (Medium/Oncogenic/Non-cancer/Uncertain significance)         |                   |                 |                    |                  |                 |                   |                                                                                                              |                                                        |
| 28          | HBL-DH    | +             | -    | -    | GCB     | 80   | +    | +    | +    | +         | 95              |                                                                    |                   |                 |                    |                  |                 |                   |                                                                                                              |                                                        |
| 30          | HBL NOS   | +             | -    | -    | GCB     | 90   | +    | +    | +    | +         | 99              | E68fs(NA)<br>V67L(Low/Oncogenic/Non-cancer/Uncertain significance) | L292fs (NA)       |                 |                    |                  |                 |                   | Y234D (Medium/Oncogenic/Cancer/Likely pathologic)<br>KI139N (Medium/Oncogenic/Cancer/Uncertain significance) |                                                        |
| 32          | BL        | +             | -    | -    | GCB     | 90   | -    | +    | -    | +         | 99              | Q63* (NA)                                                          |                   |                 |                    |                  |                 |                   |                                                                                                              |                                                        |
| 34          | BL        | +             | -    | -    | GCB     | 90   | -    | +    | +    | +         | 99              | L78fs (NA)                                                         | Q276* (NA)        |                 |                    |                  |                 |                   |                                                                                                              | D281E (Medium/Oncogenic/Cancer/Uncertain significance) |
| 35          | BL        | +             | -    | -    | GCB     | 90   | -    | +    | +    | +         | 99              |                                                                    |                   |                 |                    |                  |                 |                   |                                                                                                              | A148T (Medium/Neutral/Cancer/Benign)                   |

| Case number | Diagnosis | Rearrangement |      |      | Hans    |      |      | IHC  |      |           | ID3 (NP_002158)                                                                                                                                                                                | BTG2 (NP_006754)                                       | CCND3 (NP_001751) | MYC (NP_002458) | CDKN2A (NP_000068) | BTG1 (NP_001722) | MAX (NP_002373) | TP53 (NP_0000537) | TCF3 (NP_001129611)                                        |                                                           |
|-------------|-----------|---------------|------|------|---------|------|------|------|------|-----------|------------------------------------------------------------------------------------------------------------------------------------------------------------------------------------------------|--------------------------------------------------------|-------------------|-----------------|--------------------|------------------|-----------------|-------------------|------------------------------------------------------------|-----------------------------------------------------------|
|             |           | MYC           | BCL2 | BCL6 | MYC (%) | BCL2 | CD10 | BCL6 | IRF4 | Ki-67 (%) |                                                                                                                                                                                                |                                                        |                   |                 |                    |                  |                 |                   |                                                            |                                                           |
| 36          | HBL NOS   | +             | -    | -    | GCB     | 80   | -    | +    | +    | 99        | L64F (Medium/NA/Non-cancer/Uncertain significance)                                                                                                                                             | S21N (Low/Oncogenic/Non-cancer/Uncertain significance) |                   |                 |                    |                  |                 |                   |                                                            |                                                           |
| 37          | DLBCL     | -             | -    | -    | non-GCB | 80   | +    | -    | +    | 95        |                                                                                                                                                                                                | P72T (Medium/Oncogenic/Non-cancer/Likely pathogenic)   |                   |                 |                    |                  |                 |                   |                                                            |                                                           |
| 38          | BL        | +             | -    | -    | GCB     | 80   | -    | +    | +    | 95        | Y76* (NA)                                                                                                                                                                                      | E54D (Low/Oncogenic/Non-cancer/Likely pathogenic)      |                   |                 |                    |                  |                 |                   | E555fs (NA)                                                |                                                           |
| 41          | DLBCL     | +             | -    | -    | non-GCB | 99   | +    | -    | +    | 90        |                                                                                                                                                                                                |                                                        |                   |                 |                    |                  |                 |                   |                                                            |                                                           |
| 42          | HBL NOS   | +             | -    | -    | GCB     | 80   | +    | -    | +    | 95        |                                                                                                                                                                                                |                                                        |                   |                 |                    |                  |                 |                   |                                                            |                                                           |
| 44          | DLBCL     | -             | +    | -    | non-GCB | 80   | +    | -    | +    | 95        | A126-L128delinsV (NA)<br>A129fs (NA)<br>S149F (Medium/Oncogenic/Non-cancer/Uncertain significance)                                                                                             |                                                        |                   |                 |                    |                  |                 |                   | A138Y (Medium/Oncogenic/Cancer/Uncertain significance)     |                                                           |
| 46          | DLBCL     | -             | -    | -    | GCB     | 70   | +    | +    | +    | 95        | L10F (Low/Oncogenic/Non-cancer/Uncertain significance)                                                                                                                                         |                                                        |                   |                 |                    |                  |                 |                   | K162I (Medium/Oncogenic/Non-cancer/Uncertain significance) |                                                           |
| 48          | HBL NOS   | -             | -    | -    | non-GCB | 70   | +    | -    | +    | 95        | L64V (Low/Oncogenic/Non-cancer/Uncertain significance)<br>L62D (Medium/Oncogenic/Non-cancer/Uncertain significance)<br>R69C (Medium/Oncogenic/Non-cancer/Uncertain significance)<br>Q140* (NA) |                                                        |                   |                 |                    |                  |                 |                   |                                                            | A148T (Medium/Neutral/Cancer/Benign)                      |
| 49          | DLBCL     | -             | +    | -    | non-GCB | 60   | +    | -    | +    | 80        |                                                                                                                                                                                                |                                                        |                   |                 |                    |                  |                 |                   |                                                            | G132S (Low/Oncogenic/Non-cancer/Uncertain significance)   |
| 52          | DLBCL     | -             | +    | -    | GCB     | 80   | +    | +    | +    | 98        |                                                                                                                                                                                                |                                                        |                   |                 |                    |                  |                 |                   |                                                            | P75T (Medium/Oncogenic/Non-cancer/Uncertain significance) |
| 53          | DLBCL     | +             | -    | -    | GCB     | 50   | +    | +    | +    | 98        |                                                                                                                                                                                                |                                                        |                   |                 |                    |                  |                 |                   |                                                            | R273G (Medium/Oncogenic/Cancer/Likely pathogenic)         |
| 55          | HBL-DH    | +             | -    | -    | GCB     | 80   | +    | +    | +    | 80        |                                                                                                                                                                                                |                                                        |                   |                 |                    |                  |                 |                   |                                                            |                                                           |
| 57          | DLBCL     | -             | +    | -    | GCB     | 90   | +    | +    | +    | 80        |                                                                                                                                                                                                |                                                        |                   |                 |                    |                  |                 |                   |                                                            | D561fs (NA)                                               |
| 58          | DLBCL     | -             | -    | -    | non-GCB | 70   | +    | -    | +    | 95        |                                                                                                                                                                                                |                                                        |                   |                 |                    |                  |                 |                   |                                                            | Y234C (Medium/Oncogenic/Cancer/Likely pathogenic)         |

| Case number | Diagnosis | Rearrangement |      |      | Hans algo-rithm |      |      | IHC  |      |      | K1+67 (%) | ID3 (NP_002158) | BTG2 (NP_006754) | CCND3 (NP_001751) | MYC (NP_002458) | CDKN2A (NP_000068) | BTG1 (NP_001722) | MAX (NP_002373) | TP53 (NP_0000537) | TCF3 (NP_001129611)                                       |
|-------------|-----------|---------------|------|------|-----------------|------|------|------|------|------|-----------|-----------------|------------------|-------------------|-----------------|--------------------|------------------|-----------------|-------------------|-----------------------------------------------------------|
|             |           | MYC           | BCL2 | BCL6 | MYC (%)         | BCL2 | CD10 | BCL6 | BCL2 | CD10 |           |                 |                  |                   |                 |                    |                  |                 |                   |                                                           |
| 62          | HBL NOS   | -             | -    | +    | GCB             | 70   | +    | +    | +    | +    | 95        |                 |                  |                   |                 |                    |                  |                 |                   | R283C (Low/Oncogenic/Cancer/Likely pathogenic)            |
| 64          | DLBCL     | -             | -    | -    | non-GCB         | 70   | +    | -    | +    | -    | 90        |                 |                  |                   |                 |                    |                  |                 |                   | A82T (Medium/Oncogenic/Non-cancer/Uncertain significance) |
| 65          | DLBCL     | -             | -    | +    | GCB             | 80   | +    | +    | +    | +    | 90        |                 |                  |                   |                 |                    |                  |                 |                   |                                                           |
| 66          | DLBCL     | -             | -    | -    | GCB             | 80   | +    | +    | +    | +    | 95        |                 |                  |                   |                 |                    |                  |                 |                   | A148T (Medium/Neutral/Cancer/Benign)                      |
| 68          | HBL-DH    | +             | -    | +    | GCB             | 80   | +    | -    | +    | -    | 99        |                 |                  |                   |                 |                    |                  |                 |                   | A181P (Medium/Oncogenic/Cancer/Likely pathogenic)         |

The case number, clinical diagnosis, type of rearrangement, Hans algorithm, results of IHC and FISH and amino acid changes with functional impact (MutationAssessor and FATHMM) are included in this table. IHC: immunohistochemistry, FISH: fluorescence *in situ* hybridization.
